# Supplementary material for: Cross-country analysis of contextual factors and implementation strategies in under-5 mortality reduction in six low- and middle-income countries 2000–2015
Source: Springer Nature journal article supplement (doi:10.1186/s12887-023-03906-5), 2024-02-28
Supplement: MOESM1 [file 26796248]

Additional File 1a. List of infant and child evidence-based interventions

| Cause of Death                            | EBI                                                                                   |                                                                        |
|-------------------------------------------|---------------------------------------------------------------------------------------|------------------------------------------------------------------------|
| <b>Lower respiratory infections</b>       | Antibiotic treatment                                                                  |                                                                        |
|                                           | Vaccination: PCV                                                                      |                                                                        |
|                                           | Vaccination: Hib                                                                      |                                                                        |
|                                           | Community-based management                                                            |                                                                        |
|                                           | Facility-based management                                                             |                                                                        |
| <b>Diarrheal diseases</b>                 | Oral rehydration therapy                                                              |                                                                        |
|                                           | Zinc supplementation                                                                  |                                                                        |
|                                           | Vaccination: Rotavirus                                                                |                                                                        |
|                                           | Community-based management                                                            |                                                                        |
|                                           | Facility-based management                                                             |                                                                        |
| <b>Malaria</b>                            | Antimalarial combination therapy                                                      |                                                                        |
|                                           | Rapid diagnostic testing                                                              |                                                                        |
|                                           | Insecticide-treated nets                                                              |                                                                        |
|                                           | Indoor residual spray                                                                 |                                                                        |
|                                           | Intermittent preventative therapy for high-risk groups                                |                                                                        |
|                                           | Community-based management                                                            |                                                                        |
|                                           | Facility-based management                                                             |                                                                        |
| <b>Measles</b>                            | Vaccination: Measles                                                                  |                                                                        |
|                                           | Vitamin A supplementation (prior to vaccination)                                      |                                                                        |
| <b>Malnutrition</b>                       | Exclusive breastfeeding for six months                                                |                                                                        |
|                                           | Continued breastfeeding and complementary feeding after six months                    |                                                                        |
|                                           | Vitamin A supplementation                                                             |                                                                        |
|                                           | Management of severe acute malnutrition (ready-to-use food, rehydration, antibiotics) |                                                                        |
| <b>HIV</b>                                | ARV treatment for infants and children                                                |                                                                        |
|                                           | HIV testing of children born to HIV+ mothers                                          |                                                                        |
|                                           | Prevention of mother-to-child transmission                                            | Early diagnosis of pregnant women (or pre-pregnancy)                   |
|                                           |                                                                                       | PMTCT treatment for mothers* and post-partum to exposed infants        |
|                                           |                                                                                       | Elective C-section for untreated HIV+ mothers**; replacement feeding** |
|                                           |                                                                                       | ARV treatment for mother for life as prevention (started in 2012)      |
| Exclusive breast feeding                  |                                                                                       |                                                                        |
| <b>Meningitis</b>                         | Vaccination: PCV meningococcal                                                        |                                                                        |
|                                           | Vaccination: Hib                                                                      |                                                                        |
|                                           | Vaccination: Meningococcal                                                            |                                                                        |
|                                           | Antibiotic treatment                                                                  |                                                                        |
|                                           | Chemoprophylaxis during acute outbreaks                                               |                                                                        |
| <b>Other vaccine preventable diseases</b> | Vaccination: Tetanus                                                                  |                                                                        |
|                                           | Vaccination: Diphtheria                                                               |                                                                        |
|                                           | Vaccination: Pertussis                                                                |                                                                        |
|                                           | Vaccination: Polio                                                                    |                                                                        |

ARV: anti-retroviral therapy; PCV: pneumococcal conjugate vaccine; PMTCT: prevention of mother-to-child transmission of HIV

\* No longer recommended (PMTCT versus ART for life)

\*\*No longer recommended for women on ART with suppressed viral load

Additional File 1b. List of neonatal evidence-based interventions

| <b>Period of risk</b>                                       | <b>EBI</b>                                                                                                |                                                                                           |
|-------------------------------------------------------------|-----------------------------------------------------------------------------------------------------------|-------------------------------------------------------------------------------------------|
| <b>Preconception</b>                                        | Folic acid supplementation                                                                                |                                                                                           |
| <b>Antenatal</b>                                            | Tetanus vaccination                                                                                       |                                                                                           |
|                                                             | Malaria prevention and treatment                                                                          | Intermittent presumptive treatment<br>Insecticide-treated bed nets                        |
|                                                             | Iodine supplementation (in endemic iodine deficient settings)                                             |                                                                                           |
|                                                             | 4 or more antenatal visits (ANC4)                                                                         |                                                                                           |
|                                                             | Prevention and treatment of preeclampsia and eclampsia                                                    | Antihypertensive treatment for severe hypertension<br>Magnesium sulfate<br>Early delivery |
|                                                             | <b>Intrapartum</b>                                                                                        | Antibiotics for preterm premature rupture of membranes                                    |
| Corticosteroids for preterm labor                           |                                                                                                           |                                                                                           |
| C-section for breech or obstructed labor                    |                                                                                                           |                                                                                           |
| Active management of delivery (including partograph)        |                                                                                                           |                                                                                           |
| Clean delivery practices (incl. clean cord-cutting)         |                                                                                                           |                                                                                           |
| Trained birth attendant                                     |                                                                                                           |                                                                                           |
| Facility-based delivery                                     |                                                                                                           |                                                                                           |
| Basic emergency obstetric and newborn care (BEmONC)         |                                                                                                           |                                                                                           |
| Comprehensive emergency obstetric and newborn care (CEmONC) |                                                                                                           |                                                                                           |
| Timely transport for higher level care for mother           |                                                                                                           |                                                                                           |
| <b>Postnatal</b>                                            | Newborn resuscitation                                                                                     |                                                                                           |
|                                                             | Immediate breastfeeding                                                                                   |                                                                                           |
|                                                             | Prevention and management of hypothermia                                                                  | Immediate drying and wrapping<br>Delayed bathing<br>Skin-to-skin<br>Baby warming          |
|                                                             | Kangaroo care for LBW/prematurity                                                                         |                                                                                           |
|                                                             | Timely transport for higher level care for mother                                                         |                                                                                           |
|                                                             | Post-partum visits to identify danger signs and provide active referral                                   |                                                                                           |
|                                                             | Antibiotics for suspected or confirmed infection                                                          |                                                                                           |
|                                                             | Surfactant therapy for respiratory distress syndrome and prematurity                                      |                                                                                           |
|                                                             | Neonatal intensive care units (equipped, trained staff, standards and protocols established and followed) |                                                                                           |
