# Supplementary material for: Cross-country analysis of contextual factors and implementation strategies in under-5 mortality reduction in six low- and middle-income countries 2000–2015
Source: Springer Nature journal article supplement (doi:10.1186/s12887-023-03906-5), 2024-02-28
Supplement: MOESM2 [file 26796248]

## Additional File 2. Example Exemplars in Under 5 Mortality Key Informant Interview Guide

### Interviewee Information

Name:

Date:

Interviewer(s):

\_\_\_ Phone \_\_\_ In person

Informed consent received: \_\_\_ Yes \_\_\_ No (if no-end interview)

Recording consent received: \_\_\_ Yes \_\_\_ No

1. What position(s) did you hold starting in 2000? And after?

| year | Position/typology* | relevance |
|------|--------------------|-----------|
|      |                    |           |
|      |                    |           |
|      |                    |           |
|      |                    |           |
|      |                    |           |

\*National level, MOH-across divisions, MOH-specific divisions, Implementers (EBI or area of focus if relevant) External donors, Others

If pertinent, prior to 2000

2. What is your current position?

3. Please describe the role you and your organization played in the work to reduce U5M in Senegal  
 a. Probe: location, area of focus, duration, age range, level of health system, specific EBI or COD

Senegal has made remarkable progress in dropping the rate of U5 mortality since the year 2000. We will be focusing on the time period between \_\_\_\_\_ (if they were only involved for part of the 15 years)

4. Thinking broadly, what do you think were key facilitators in Senegal that helped to enable this success both in 2000 and over time?

Probe: Ministry leadership  
 Organizational structure  
 Interaction with other ministries  
 Culture and environment in the ministry  
 Donors  
 Engagement of stakeholders  
 National level factors

5. What were some barriers that challenged the ability to start or continue the work to reduce U5M?

Probe: Ministry leadership  
 Organizational structure  
 Needs from other ministries  
 Culture and environment in the ministry

Donors/funding  
 Engagement of stakeholders  
 National level factors

Probe: In 2005? 2010? Over the last 5 years?

6. What changes were made to overcome these?

7. What other factors contributed to the reduction of U5M, initially in 2000 and over time?

Probe: Partnerships  
 Culture  
 Learning  
 Accountability  
 Stakeholders  
 Leadership

8. Where are areas where there are new or remaining challenges in U5M?

COD or EBI we are interviewing for: \_\_\_\_\_

**9. How was U5M recognized as a priority problem for work at the MOH?**

Probe: Data and other sources of information  
Funding opportunities  
Other input from within country, donors  
Comparing with other countries  
Community/stakeholder engagement  
National government

**Probe: When was a focus on Neonatal mortality introduced (if it was)? Why?**

**10. What other specific influences led to national and ministry decisions to address U5M and specific priorities such as age groups or cause of death or areas of the country (versus or in addition to other problems)?**

- Probe:
  - Evidence
    - (overall and specific causes of death)
    - New interventions
  - Leadership at national level
  - Funding/donors
  - Legislation/policies
  - Mission/values of the MOH, of the country

**11. What facilitated your ability to prioritize and get resources to address U5M overall and targeted areas (COD or age group)?**

- a. Probe:
  - i. donor funding
  - ii. national leadership
  - iii. partnership with Ministry of finance

**12. (Show the list of EBIs) In your opinion, which were the top 3 EBIs that contributed to the success of reducing U5M overall since 2000?**

**EBI1:** \_\_\_\_\_

- a. How did you choose this one?  
Probe: Evidence of need, evidence of effectiveness  
Funding,  
national government priority  
stakeholders priority (community, partners, donors)
- b. How did you prepare to implement this intervention?  
Probe:  
Adaptation of intervention and implementation, use of pilots  
Stakeholder engagement (partners, community, other elements of government)
- c. What helped you implement it?
  - i. how it was started (ilot, or not, etc)
  - ii. evidence available on effectiveness
  - iii. leadership buy-in
  - iv. stakeholder support/engagement process
  - v. accountability,

- d. What were the challenges?
  - i. Funding
  - ii. Structure and strength of the health system
  - iii. Legislation
  - iv. Community
  - v. quality
  - vi. other

- e. What did you need to change once you had started?  
Probe: Intervention components vs implementation, why it was changed, any

- f. Overall how effective was the implementation of the intervention
  - i. Probe:
    - 1. Reach-overall, equity
    - 2. Acceptability by community and providers
    - 3. Fidelity (quality)
    - 4. Feasibility ex. Cost, ability to implement
    - 5. Effectiveness

- g. Have you been able to reach scale and sustain the intervention and change?
  - i. What are the challenges (if any) to sustaining this success

**EBI2:** \_\_\_\_\_

- a. How did you choose this one?  
Probe: Evidence of need, evidence of effectiveness  
Funding,  
national government priority  
stakeholders priority (community, partners, donors)
- b. How did you prepare to implement this intervention?  
Probe:  
Adaptation of intervention and implementation, use of pilots  
Stakeholder engagement (partners, community, other elements of government)
- c. What helped you implement it?
  - ii. how it was started (ilot, or not, etc)
  - iii. evidence available on effectiveness
  - iv. leadership buy-in
  - v. stakeholder support/engagement process
  - vi. accountability,
- d. What were the challenges?
  - vii. Funding
  - viii. Structure and strength of the health system
  - ix. Legislation
  - x. Community
  - xi. quality
  - xii. other
- e. What did you need to change once you had started?

Probe: Intervention components vs implementation, why it was changed, any

f. Overall how effective was the implementation of the intervention

xiii. Probe:

1. Reach-overall, equity
2. Acceptability by community and providers
3. Fidelity (quality)
4. Feasibility ex. Cost, ability to implement
5. Effectiveness

g. Have you been able to reach scale and sustain the intervention and change?

What are the challenges (if any) to sustaining this success

**EBI 3:** \_\_\_\_\_

a. How did you choose this one?

Probe

- Evidence of need, evidence of effectiveness
- Funding,
- national government priority
- stakeholders priority (community, partners, donors)

b. How did you prepare to implement this intervention?

Probe:

Adaptation of intervention and implementation, use of pilots  
Stakeholder engagement (partners, community, other elements of government)

c. What helped you implement it?

- how it was started (ilot, or not, etc)
- evidence available on effectiveness
- leadership buy-in
- stakeholder support/engagement process
- accountability,

d. What were the challenges?

- Funding
- Structure and strength of the health system
- Legislation
- Community
- quality
- other

e. What did you need to change once you had started?

Probe: Intervention components vs implementation, why it was changed, any

f. Overall how effective was the implementation of the intervention

Probe:

- Reach-overall, equity
- Acceptability by community and providers
- Fidelity (quality)
- Feasibility ex. Cost, ability to implement
- Effectiveness

g. Have you been able to reach scale and sustain the intervention and change?

What are the challenges (if any) to sustaining this success

**13. If U5M was already dropping by 2000, ask for general EBIs and factors which were associated with the decline prior to 2000**

**14. In your opinion, what were 1-2 EBIs that were not effective or less effective than expected in contributing to reducing U5M overall or neonatal mortality specifically?**

**EBI1:** \_\_\_\_\_

a. How did you choose this one?

Probe: Evidence of need, evidence of effectiveness

Funding,  
national government priority  
stakeholders priority (community, partners, donors)

b. What do you think made it ineffective?

Probe: Preparation – adaptation, partners, engagement

Probe: Implementation – strategy, start and scale, leadership, accountability, sustainment, culture, ineffectiveness

Probe: Outcomes – Reach, acceptability, adoption, feasibility, cost, fidelity

c. What would you change if you did it again?

Probe: Intervention components and/or implementation strategy

**EBI2:** \_\_\_\_\_

a. How did you choose this one?

Probe: Evidence of need, evidence of effectiveness

Funding,  
national government priority  
stakeholders priority (community, partners, donors)

b. What do you think made it ineffective?

Probe: Preparation – adaptation, partners, engagement

Probe: Implementation – strategy, start and scale, leadership, accountability, sustainment, culture, ineffectiveness

Probe: Outcomes – Reach, acceptability, adoption, feasibility, cost, fidelity

c. What would you change if you did it again?

Probe: Intervention components and/or implementation strategy

**15. Thinking broadly, what do you think were key facilitators at the Ministry of Health that helped to enable this success since 2000 (note the timeframe)?**

Probe: Ministry leadership

Organizational structure  
Interaction with other ministries  
Culture and environment in the ministry  
Donors  
Engagement of stakeholders  
National level factors

**16. What were some barriers that challenged your ability in the work to reduce U5M (note the time frame)?**

Probe: Ministry leadership  
Organizational structure  
Needs from other ministries  
Culture and environment in the ministry  
Donors/funding  
Engagement of stakeholders  
National level factors

Probe: Who held your position before you?  
Who held your position after you?

17. What changes were made to overcome these?

18. Overall, how did you know if work to reduce U5M and/or NMR was on-track or off-track?

19. What other factors outside of the MOH contributed to the reduction of U5M since 2000? How has that differed for NMR?

Probe:

- Partnerships (probe-with whom-implementers, private sector, donors others)
- Other interventions (ex. Nutrition, WASH, economic development, education)
- Learning at the MOH
- Accountability in the health sector
- Governance and Leadership (national or local)

20. Where are areas where there are new or remaining challenges in U5M?

Probe: age (NMR), change in COD, equity/coverage, other?

21. From the lessons learned in Senegal, what would be knowledge and lessons which you think could be transferable (with adaptation) to other countries trying to reduce U5M generally including neonatal mortality and how would you suggest they implement them?

**Contextual factors:**

Governance  
Accountability  
Donor coordination  
Financial  
Prioritization/culture (ex. Equity)  
HMIS/data use

**EBIs and how they were chosen and implemented**

Policy which need to be in place  
Stakeholder engagement  
How decisions were made  
Interaction/coordination with other ministries  
Role of private sector  
Role of research

22. If there is an area not well covered in the desk review-ask if there any really critical reports or sources of information that would help us better understand the progress and challenges of reducing U5M since 2000 for \_\_\_\_\_?

23. Who else should we speak to better understand the reductions in U5M in Senegal?

| Non-neonatal EBIs Interventions delivered through the Health System |                                                                                       |
|---------------------------------------------------------------------|---------------------------------------------------------------------------------------|
| Cause of Death                                                      | Evidence-Based Interventions                                                          |
| Lower respiratory infections                                        | Antibiotic treatment                                                                  |
|                                                                     | Vaccination: PCV                                                                      |
|                                                                     | Vaccination: Hib                                                                      |
|                                                                     | Community-based management<br>Facility-based management                               |
| Diarrheal diseases                                                  | Oral rehydration therapy                                                              |
|                                                                     | Zinc supplementation                                                                  |
|                                                                     | Vaccination: Rotavirus                                                                |
|                                                                     | Community-based management<br>Facility-based management                               |
|                                                                     | WASH (prevention)*                                                                    |
|                                                                     | Antimalarial combination therapy                                                      |
| Malaria                                                             | Rapid diagnostic testing                                                              |
|                                                                     | Insecticide-treated nets                                                              |
|                                                                     | Indoor residual spray                                                                 |
|                                                                     | Intermittent preventative therapy for high-risk groups                                |
|                                                                     | Community-based management<br>Facility-based management                               |
|                                                                     | Vaccination: Measles                                                                  |
|                                                                     | Vitamin A supplementation (prior to vaccination)                                      |
| Malnutrition                                                        | Promotion and support of exclusive breastfeeding for 6 months                         |
|                                                                     | Promotion of continued breastfeeding and complementary feeding after 6 mos            |
|                                                                     | Vitamin A supplementation                                                             |
|                                                                     | Management of severe acute malnutrition (ready-to-use food, rehydration, antibiotics) |
|                                                                     | Broader nutrition efforts (prevention)*                                               |
| HIV                                                                 | Antiretroviral treatment for infants and children                                     |
|                                                                     | HIV testing of children born to HIV+ mothers                                          |
|                                                                     | Prevention of mother-to-child transmission                                            |
|                                                                     | Early diagnosis of pregnant women (or pre-pregnancy)                                  |
|                                                                     | PMTCT treatment for mothers** and post-partum to exposed infants                      |
|                                                                     | Elective C-section for HIV+ mothers***; replacement feeding***                        |
|                                                                     | ART for mother for life (B+) (started in 2012)                                        |
| Exclusive breast feeding                                            |                                                                                       |
| Meningitis                                                          | Vaccination: PCV                                                                      |
|                                                                     | Vaccination: Hib                                                                      |
|                                                                     | Vaccination: Meningococcal                                                            |
|                                                                     | Antibiotic treatment<br>Chemoprophylaxis during acute outbreaks                       |
| Other vaccine preventable diseases                                  | Vaccination: Tetanus                                                                  |
|                                                                     | Vaccination: Diphtheria                                                               |
|                                                                     | Vaccination: Pertussis                                                                |
|                                                                     | Vaccination: Polio                                                                    |
| General                                                             | Vitamin A                                                                             |
| Syphilis                                                            | Screening of pregnant women                                                           |
|                                                                     | Treatment with penicillin (pregnant women, exposed infants)                           |

\*: broader initiatives; will note coverage \*\* no longer recommended \*\*\*No longer recommended for women on ART with suppressed VL

| Neonatal-Specific Evidence-Based Interventions delivered through the Health System  |                                                                                                    |                                                                                            |
|-------------------------------------------------------------------------------------|----------------------------------------------------------------------------------------------------|--------------------------------------------------------------------------------------------|
| Period of Risk                                                                      | Evidence-Based Intervention                                                                        |                                                                                            |
| Preconception                                                                       | Folic acid supplementation                                                                         |                                                                                            |
| Antenatal                                                                           | Tetanus vaccination                                                                                |                                                                                            |
|                                                                                     | Malaria prevention and treatment                                                                   | Intermittent presumptive treatment<br>ITNs                                                 |
|                                                                                     | Iodine supplementation (in endemic iodine deficient settings)<br>4 or more antenatal visits (ANC4) |                                                                                            |
|                                                                                     | Prevention and treatment of preeclampsia and eclampsia                                             | Antihypertensive treatment for severe hypertension<br>Magnesium sulfate<br>Early delivery  |
|                                                                                     | Intrapartum                                                                                        | Antibiotics for PPROM                                                                      |
| Corticosteroids for preterm labor                                                   |                                                                                                    |                                                                                            |
| C-section for breech or obstructed labor                                            |                                                                                                    |                                                                                            |
| Active management of delivery (including partograph)                                |                                                                                                    |                                                                                            |
| Clean delivery practices (incl. clean cord-cutting)                                 |                                                                                                    |                                                                                            |
| Trained birth attendant                                                             |                                                                                                    |                                                                                            |
| Facility-based delivery                                                             |                                                                                                    |                                                                                            |
| Access to Basic emergency obstetric and newborn care (BEmONC)                       |                                                                                                    |                                                                                            |
| Access to Comprehensive emergency obstetric and newborn care (CEmONC)               |                                                                                                    |                                                                                            |
| Timely transport for higher level care for mother (can be postnatal period as well) |                                                                                                    |                                                                                            |
| Postnatal                                                                           | Newborn resuscitation                                                                              |                                                                                            |
|                                                                                     | Immediate breastfeeding                                                                            |                                                                                            |
|                                                                                     | Prevention and management of hypothermia                                                           | Immediate drying and wrapping<br>Delayed bathing<br>Immediate Skin-to-skin<br>Baby warming |
|                                                                                     | Kangaroo care for LBW/premature                                                                    |                                                                                            |
|                                                                                     | Timely transport for higher level care for mother                                                  |                                                                                            |
|                                                                                     | Timely transport for higher level care for neonate                                                 |                                                                                            |
|                                                                                     | Post-partum visits to identify danger signs and provide active referral                            |                                                                                            |
|                                                                                     | Antibiotics for suspected or confirmed infection                                                   |                                                                                            |
|                                                                                     | NICUs (equipped, trained staff, standards/protocols established and followed)                      |                                                                                            |
|                                                                                     | Not found but could be considered: Prevention of premature labor                                   |                                                                                            |

| Selected Contextual Factors Associated with Reduced Risk of U5M: |
|------------------------------------------------------------------|
| Maternal education                                               |
| Birth spacing and reduced fertility rates                        |
| General nutrition programs (maternal and child)                  |
| Expansion of human resources                                     |
| Increased access (geographic, financial)                         |
| Improved quality of care                                         |
