# Supplementary material for: Cross-country analysis of contextual factors and implementation strategies in under-5 mortality reduction in six low- and middle-income countries 2000–2015
Source: Springer Nature journal article supplement (doi:10.1186/s12887-023-03906-5), 2024-02-28
Supplement: MOESM3 [file 26796248]

Additional File 3. Interaction of selected contextual factors, implementation strategies, and targeted outcomes, and associated Exploration, Preparation, Implementation, Adaptation, and Sustainment (EPIAS) stage

| Contextual factors, level, and where they were a facilitator or barrier                                                               | Contextual factor role as facilitator or barrier                                                                                                                                                                                                                                                                                                      | EPIAS stage where contextual factors were important | Implementation strategies chosen to address or leverage contextual factor (and associated EPIAS stage)                                                                                                                       | Outcomes targeted <sup>1</sup>                                                                                     |
|---------------------------------------------------------------------------------------------------------------------------------------|-------------------------------------------------------------------------------------------------------------------------------------------------------------------------------------------------------------------------------------------------------------------------------------------------------------------------------------------------------|-----------------------------------------------------|------------------------------------------------------------------------------------------------------------------------------------------------------------------------------------------------------------------------------|--------------------------------------------------------------------------------------------------------------------|
| Donor funding priorities and availability (Global)<br><i>Facilitator in all countries, though could be barrier at times</i>           | <u>Facilitator</u> : If present and coordinated, resulted in more efficient and sustained implementation.<br><u>Barrier</u> : When time limited or not aligned, could threaten a sustainable implementation or one which is not aligned with national plans.                                                                                          | Exploration<br>Implementation<br>Sustainment        | Leveraging donor support ( <i>EPIS</i> )<br>Donor coordination ( <i>EPIA</i> )<br>Government financing ( <i>PIAS</i> )                                                                                                       | Feasibility                                                                                                        |
| Geography (National/subnational)<br><i>Barrier in most but adapted to, Facilitator in Rwanda, No effect in Peru</i>                   | <u>Facilitator</u> : If a facilitator, leads to better access with implications for equity, reach, and coverage.<br><u>Barrier</u> : If a barrier, limits equity, reach and coverage, and a focus on equity (ex. subsidized transport), community-based care delivery, phased or limited scale-up targeting the most in need are required to address. | Preparation<br>Implementation<br>Adaptation         | Focus on equity ( <i>EPIAS</i> )<br>Rapid vs. phased vs. limited scale-up ( <i>IA</i> )<br>Community-based care delivery ( <i>PIAS</i> )<br>Leveraging in-country partner support ( <i>EPIAS</i> )                           | Acceptability<br>Feasibility<br>Effectiveness<br>Cost<br>Coverage<br>Reach<br>Fidelity<br>Equity<br>Sustainability |
| Culture of donor and partner coordination (MOH/health systems)<br><i>Facilitator in most, Both facilitator and barrier in Senegal</i> | <u>Facilitator</u> : If present, allows for coordinated, frequent engagement and leveraging of donor and partner resources required for efficient implementation.<br><u>Barrier</u> : Otherwise limits engagement and leveraging resources as well as alignment of donors and partners which impact sustainability of implementation.                 | Preparation<br>Implementation                       | Leveraging international and in-country partner and donor support ( <i>EPIAS</i> )<br>Donor and implementing partner coordination (EBI-specific) ( <i>EPIAS</i> )<br>Stakeholder engagement (international) ( <i>EPIAS</i> ) | Appropriateness<br>Acceptability<br>Feasibility<br>Reach<br>Coverage<br>Fidelity<br>Sustainability<br>Equity       |

<sup>1</sup> Targeted means that it influenced the choice of the strategy, versus the strategy improving that outcome if done well.

| Contextual factors, level, and where they were a facilitator or barrier                                                                                            | Contextual factor role as facilitator or barrier                                                                                                                                                                                                                                                             | EPIAS stage where contextual factors were important                       | Implementation strategies chosen to address or leverage contextual factor (and associated EPIAS stage)                                                                                                                                                                                                                                                                                                                                                                                                                                                                                                                 | Outcomes targeted <sup>1</sup>                                                                      |
|--------------------------------------------------------------------------------------------------------------------------------------------------------------------|--------------------------------------------------------------------------------------------------------------------------------------------------------------------------------------------------------------------------------------------------------------------------------------------------------------|---------------------------------------------------------------------------|------------------------------------------------------------------------------------------------------------------------------------------------------------------------------------------------------------------------------------------------------------------------------------------------------------------------------------------------------------------------------------------------------------------------------------------------------------------------------------------------------------------------------------------------------------------------------------------------------------------------|-----------------------------------------------------------------------------------------------------|
| Culture and capacity of data use (MOH/health systems)<br><i>Facilitator in all</i>                                                                                 | <u>Facilitator</u> : If present, supports data use for decision-making at all stages of EPIAS required for efficient implementation.<br><u>Barrier</u> : If a barrier (ex. limited capacity), limits data use for decision-making required for timely and efficient implementation.                          | Exploration<br>Preparation<br>Implementation<br>Adaptation<br>Sustainment | Data use for decision-making ( <i>EPIAS</i> )<br>Rapid and early adoption of innovations ( <i>PI</i> )<br>Small-scale testing ( <i>PIA</i> )<br>Data use to understand disease burden ( <i>EPI</i> )<br>Data use for prioritization ( <i>EPIAS</i> )<br>Supportive supervision and mentoring ( <i>IAS</i> )<br>Use of surveillance including monitoring and evaluation ( <i>PIAS</i> )<br>Data use for adaptation ( <i>IAS</i> )<br>Data systems strengthening ( <i>EPIS</i> )<br>Focus on equity ( <i>EPIAS</i> )<br>Focus on improving quality ( <i>IAS</i> )<br>Prioritization of neonatal mortality ( <i>PIA</i> ) | Acceptability<br>Effectiveness<br>Coverage<br>Reach<br>Fidelity<br>Sustainability<br>Cost<br>Equity |
| Culture and beliefs (Community/family/individual)<br><i>Facilitator in Rwanda, Senegal</i><br><i>Barrier in Nepal, Ethiopia, Peru</i><br><i>Both in Bangladesh</i> | <u>Facilitator</u> : If favorable/supportive culture and beliefs are present, improves access and acceptability.<br><u>Barrier</u> : Otherwise limits acceptability, feasibility, reach, and many other outcomes unless strategies including stakeholder engagement and community sensitization are adopted. | Preparation<br>Implementation<br>Adaptation                               | Stakeholder engagement (local) ( <i>EPIAS</i> )<br>Community education and sensitization ( <i>PIA</i> )<br>Community engagement ( <i>PIA</i> )<br>Data use for prioritization ( <i>EPIAS</i> )<br>Focus on equity ( <i>EPIAS</i> )                                                                                                                                                                                                                                                                                                                                                                                     | Acceptability<br>Feasibility<br>Reach<br>Fidelity<br>Sustainability<br>Equity                       |
